# Supplementary material
Source: PubMed Central journal article supplement (PMC9667281)

**Cotransduced**

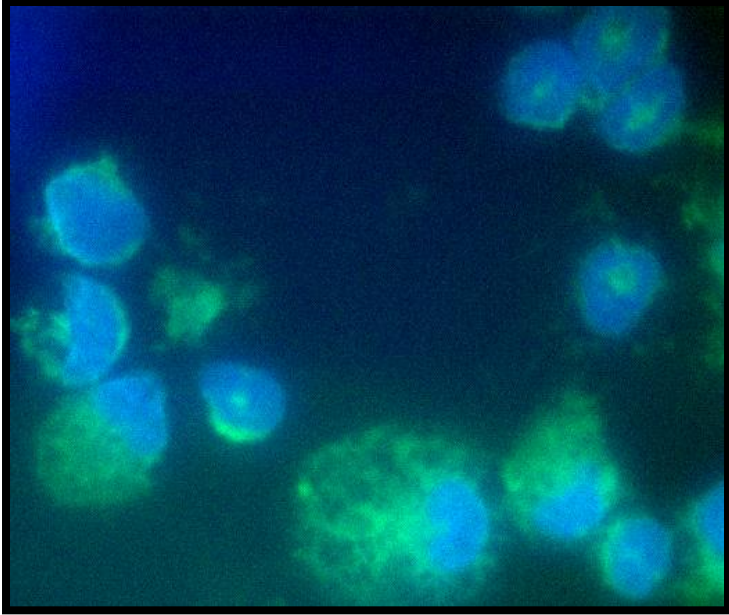

**MIG**

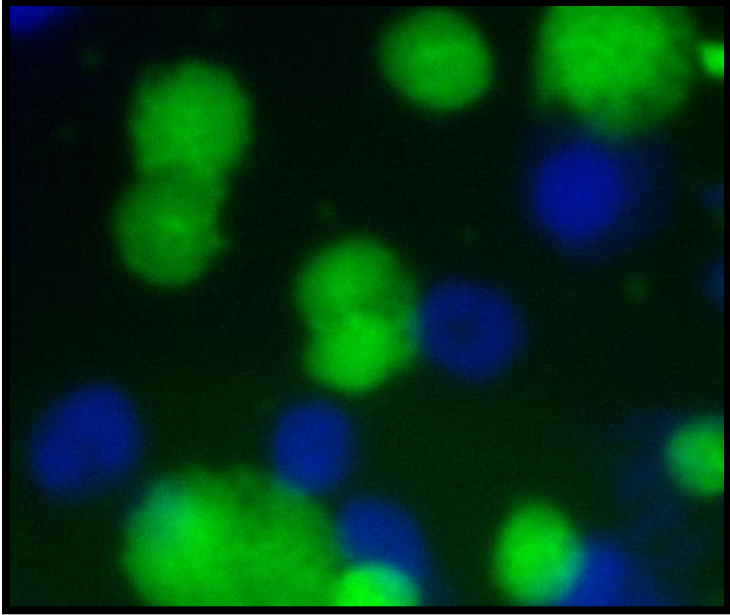

**MAG**

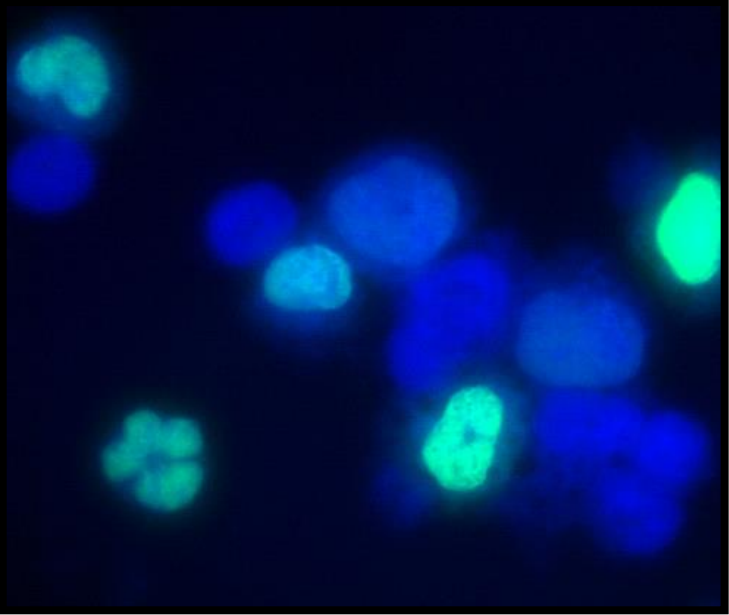

Supplement: NIHMS649307-supplement-1.pdf [file NIHMS649307-supplement-1.pdf]

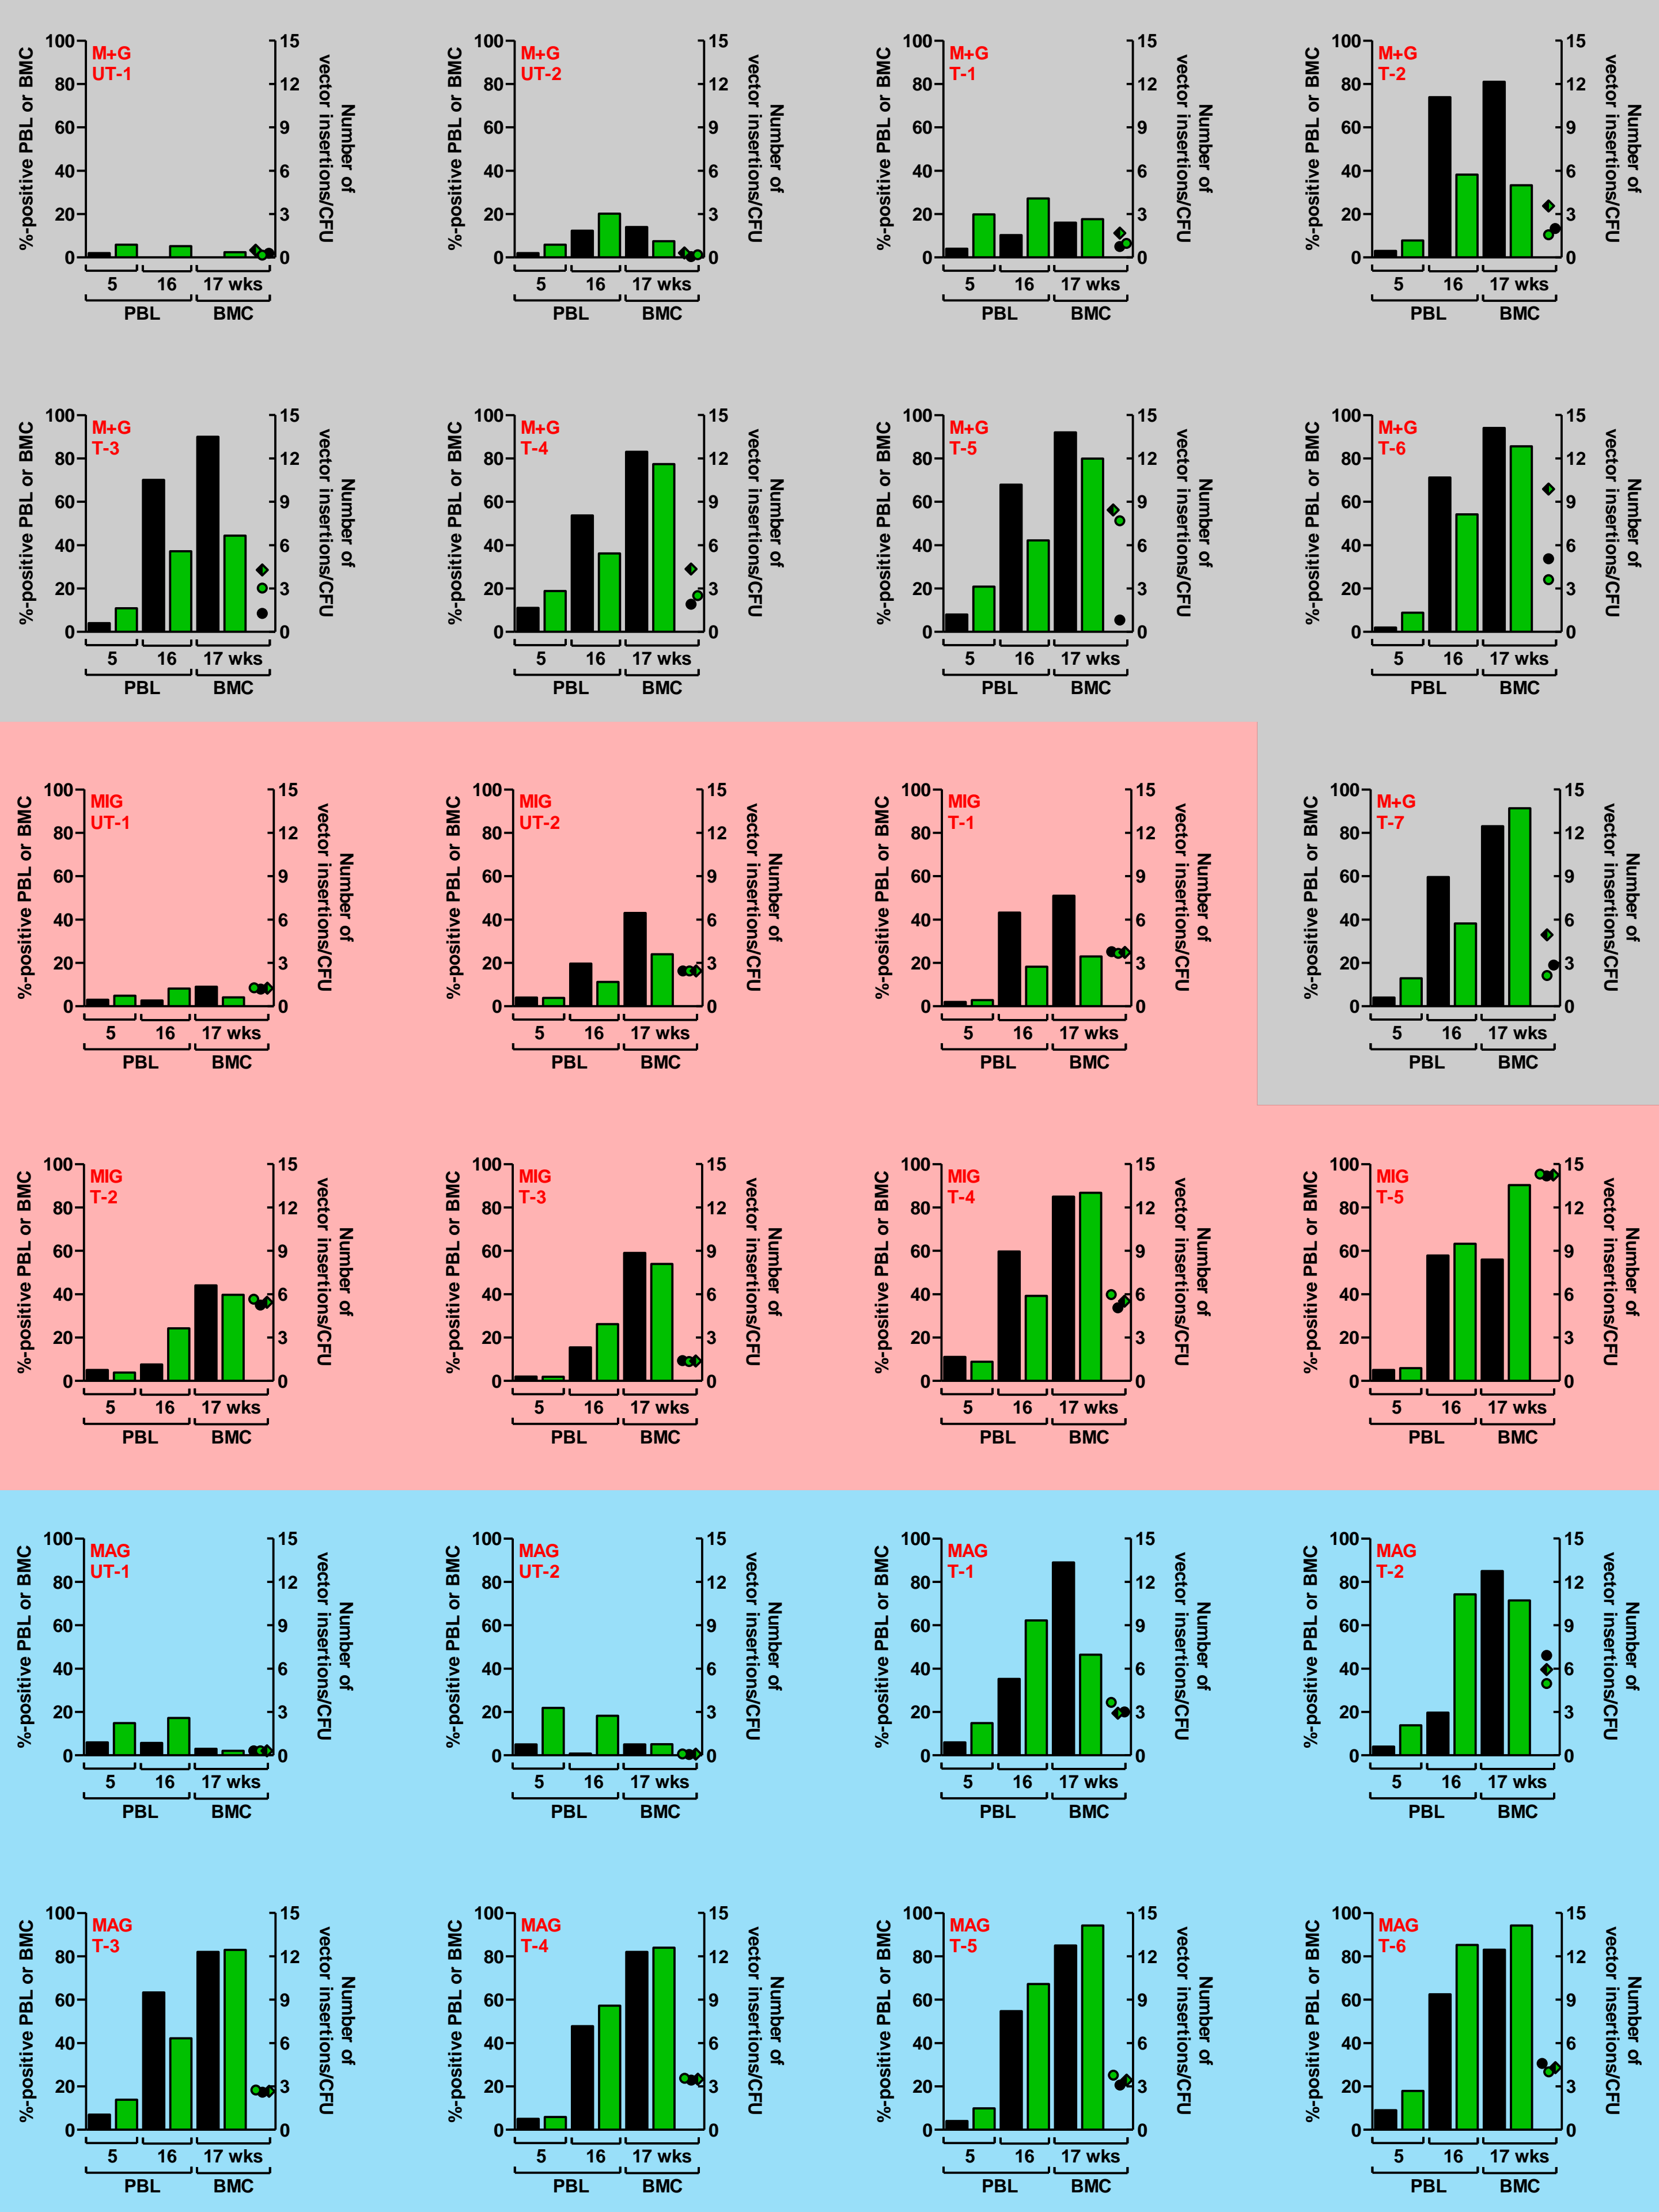

Supplement: NIHMS649307-supplement-2.pdf [file NIHMS649307-supplement-2.pdf]
